# Supplementary material
Source: PubMed Central journal article supplement (PMC3515758)
Supplement: cr2012156x2.pdf [file cr2012156x2.pdf]

**Supplementary information, Figure S2**

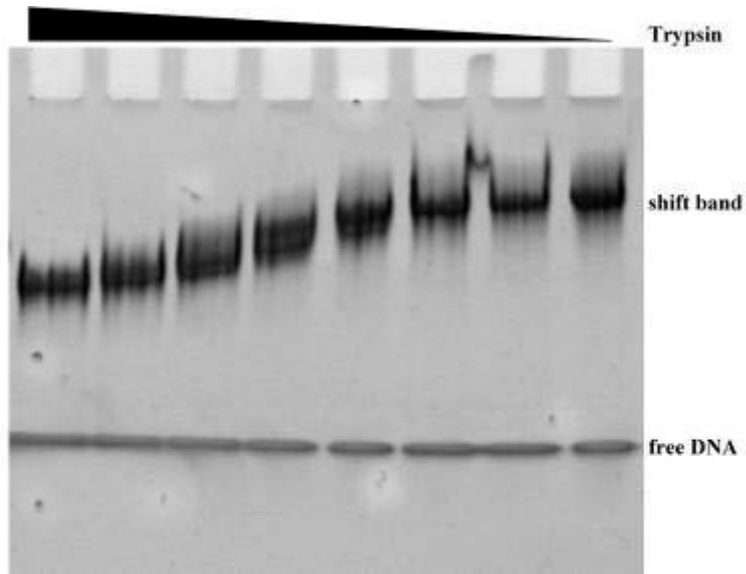

**Figure S2** Gel shift assay analysis of the dTale2-DNA binary complex. After treatment with gradient concentrations (as indicated in experiment procedure) of trypsin on ice for 30 min, the dTale2-DNA binary complex was maintained.
