# Supplementary material
Source: PubMed Central journal article supplement (PMC3515758)
Supplement: cr2012156x3.pdf [file cr2012156x3.pdf]

**Supplementary information, Figure S3**

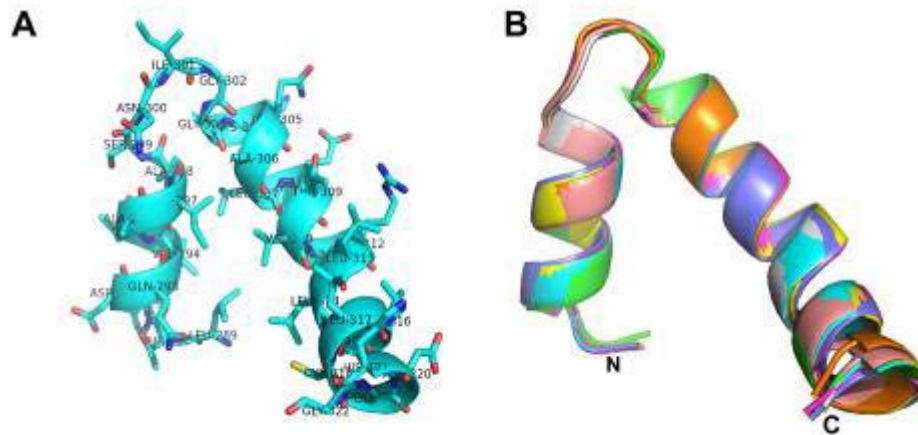

**Figure S3** The structure of dTale2 repeats. **(A)** The overall structure of dTale2 first repeat is formed by two  $\alpha$ -helices with the RVD loop as the intervening linker, the 34 residues are labeled. **(B)** All 8 repeats of dTale2 reveal an almost identical conformation (shown as cartoon representation). Molecular graphics figures were prepared with PyMOL (<http://www.pymol.org/>).
