# Supplementary material
Source: PubMed Central journal article supplement (PMC3515758)
Supplement: cr2012156x4.pdf [file cr2012156x4.pdf]

# Supplementary information, Figure S4

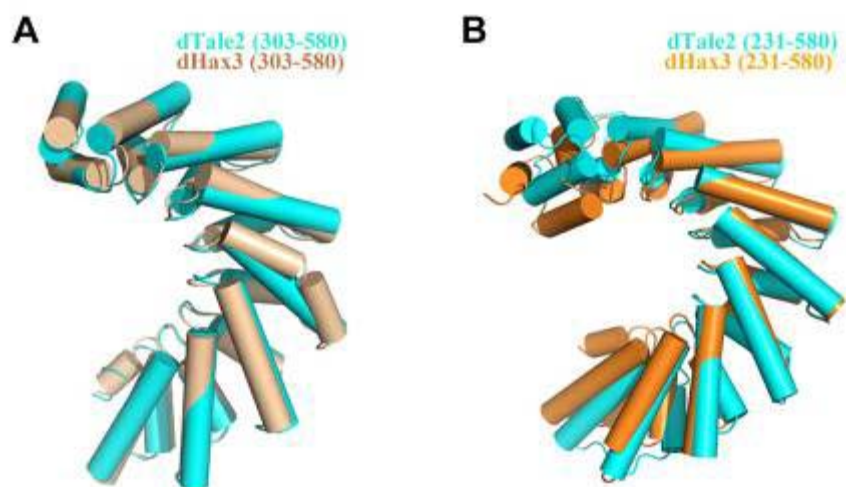

**Figure S4** Structural comparison of dTale2 protein to dHax3. **(A)** Structure superimposition of the dTale2 (303-580) (cyan) to the DNA-free dHax3 (303-580) (light yellow, PDB code 3V6P). **(B)** Structure superimposition of the dTale2 (231-580) (cyan) to the DNA-bound dHax3 (231-580) (yellow, PDB code 3V6T).
