# Supplementary material
Source: PubMed Central journal article supplement (PMC3515758)
Supplement: cr2012156x5.pdf [file cr2012156x5.pdf]

**Supplementary information, Figure S5**

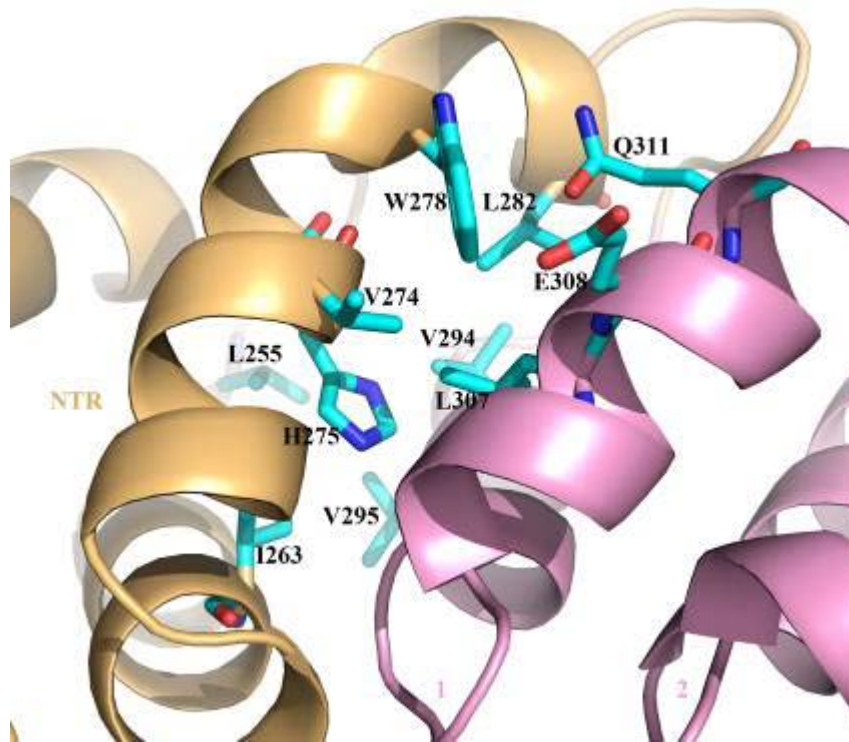

**Figure S5** The NTR caps on and stabilizes the CRD. The NTR and CRD are shown as cartoon representation and colored in lightorange and pink, respectively. The amino acids involved in interaction are shown as sticks and indicated.
