# Supplementary material
Source: PubMed Central journal article supplement (PMC3515758)
Supplement: cr2012156x6.pdf [file cr2012156x6.pdf]

## Supplementary information, Figure S6

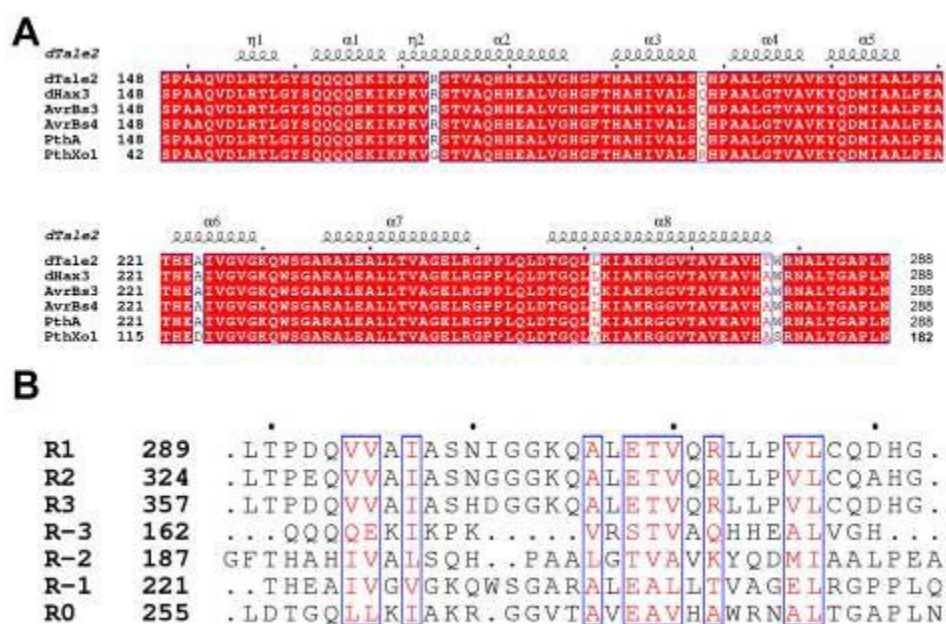

**Figure S6** The sequence alignment of the NTR. **(A)** The NTR among different TALE proteins are highly conserved in the structure-based sequence alignment. **(B)** The alignment of the N terminal four atypical repeats to the canonical TAL repeats. Identical amino acids are boxed in dark red; similar amino acids are boxed in light red; different amino acids are shown in dark. The locations of the  $\alpha$ -helices are shown above the alignment. The program ClustalW was used for sequence alignment.
