# Supplementary material
Source: PubMed Central journal article supplement (PMC3515758)
Supplement: cr2012156x7.pdf [file cr2012156x7.pdf]

Supplementary information, Figure S7

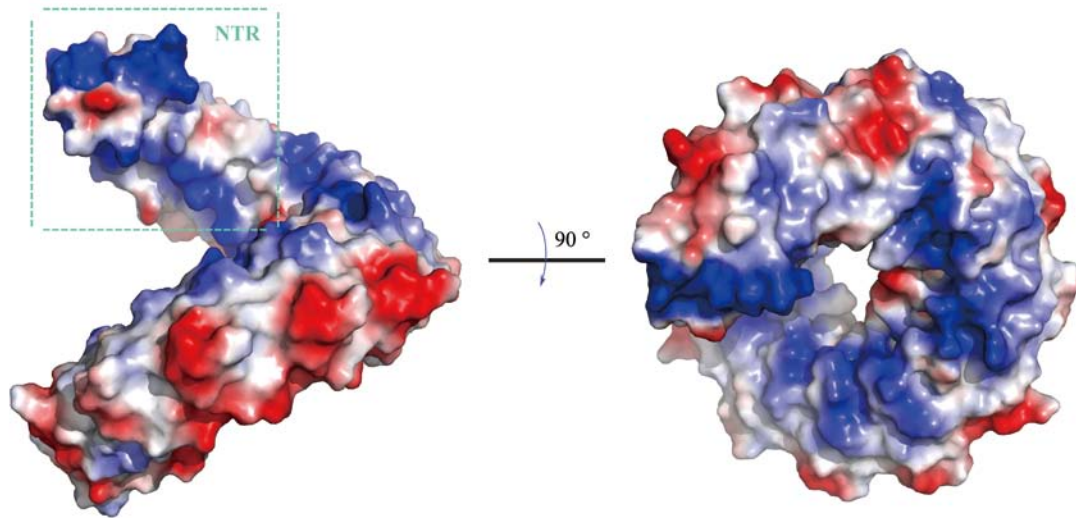

**Figure S7** The electrostatic potential surface of dTale2. dTale2 (148-610), combined with the NTR and the CRD, is in surface representation and colored according to its electrostatic potential (positive potential, blue; negative potential, red).
