# Supplementary material
Source: PubMed Central journal article supplement (PMC3515758)
Supplement: cr2012156x8.pdf [file cr2012156x8.pdf]

Supplementary information, Figure S8

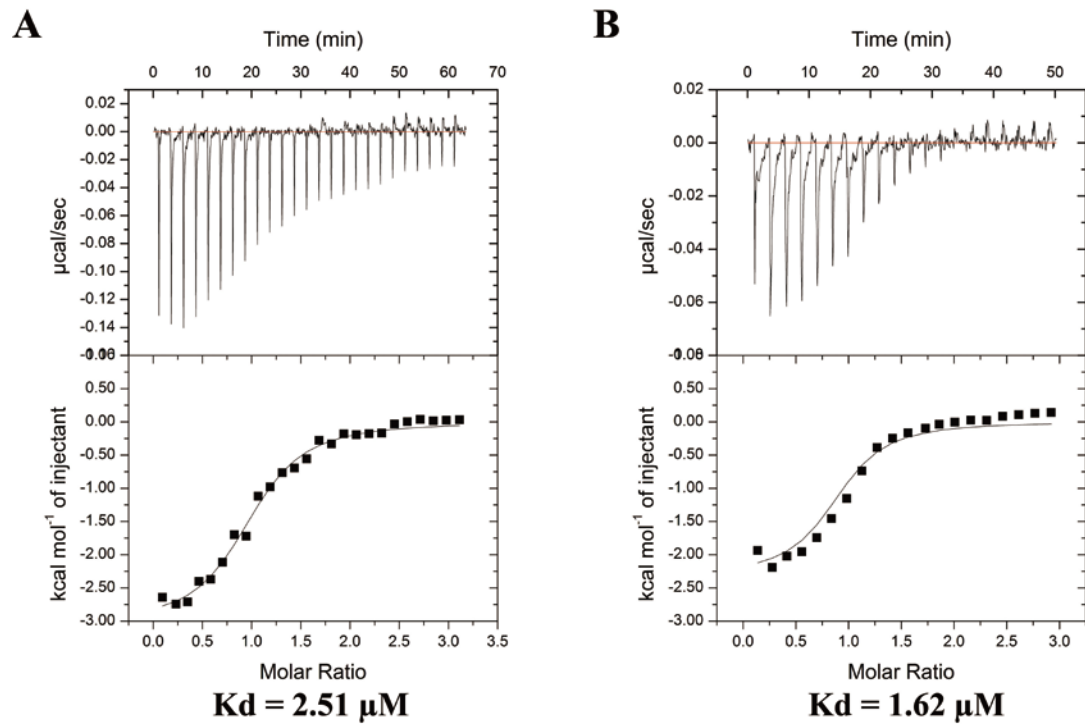

**Figure S8** The NTR nonspecifically binds to DNA. **(A)** The NTR binds to specific DNA2 (17 bp). **(B)** The NTR binds to nonspecific DNA3 (14 bp). The curves in the lower panels are the best fit to a one-set-of-sites binding model. The derived dissociation constants  $K_d$  are indicated.
