# Supplementary material
Source: PubMed Central journal article supplement (PMC3515758)
Supplement: cr2012156x9.pdf [file cr2012156x9.pdf]

## Supplementary information, Figure S9

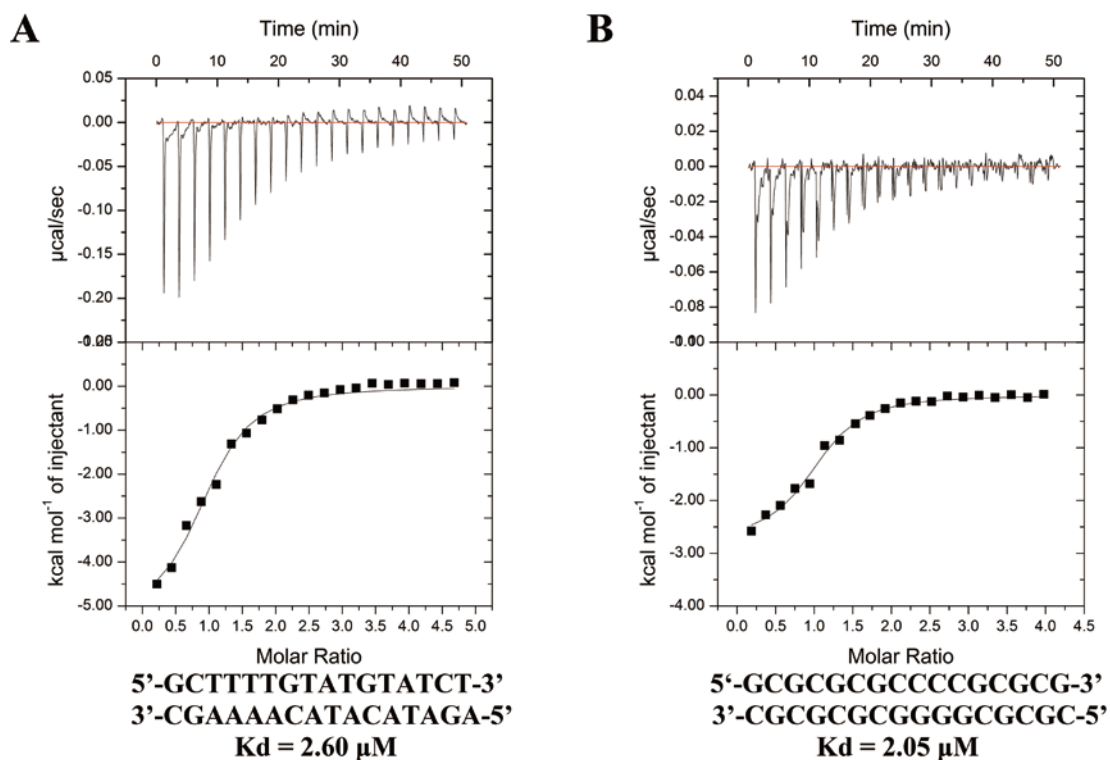

**Figure S9** The NTR binds to Thymine (T) - rich dsDNA and T-deficient dsDNA with similar affinities. **(A)** The NTR binds to T- rich dsDNA (Kd 2.60 µM). **(B)** The NTR binds to T-deficient dsDNA (Kd 2.05 µM). The curves in the lower panels are the best fit to a one-set-of-sites binding model. The derived dissociation constants Kd are indicated.
