# Supplementary material
Source: PubMed Central journal article supplement (PMC3515758)
Supplement: cr2012156x10.pdf [file cr2012156x10.pdf]

supplementary information, Figure S10

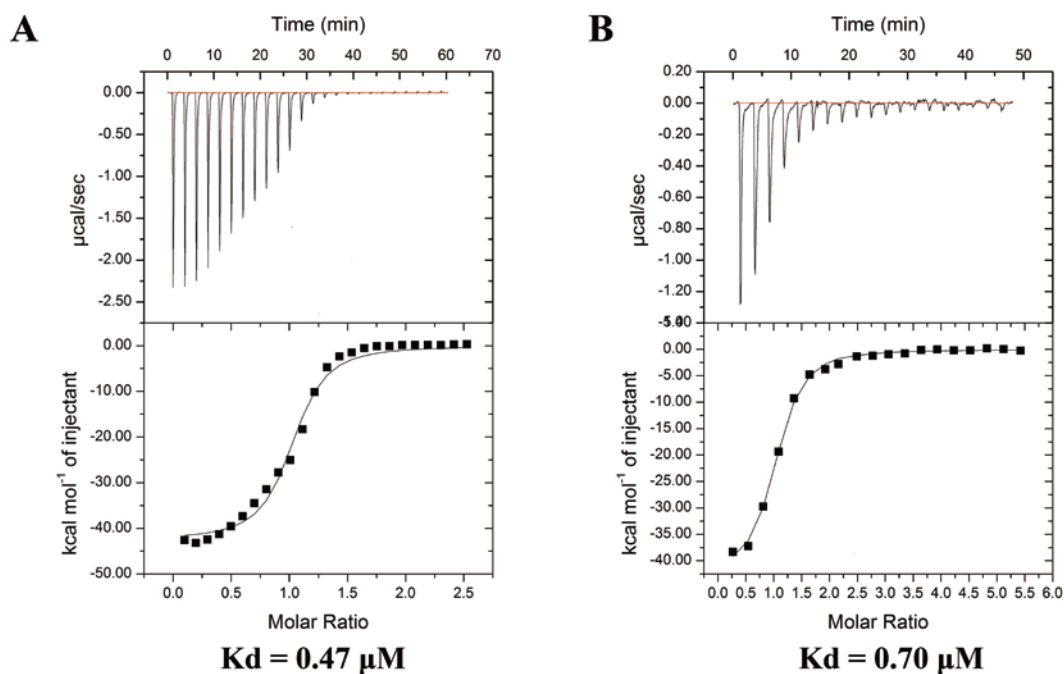

**Figure S10** The dTale2 proteins bind to specific dsDNA. **(A)** The dTale2 (148-610) protein binds to specific dsDNA2. **(B)** The dTale2 (148-766) protein binds to specific dsDNA2. The curves in the lower panels are the best fit to a one-set-of-sites binding model. The derived dissociation constants  $K_d$  are indicated.
