# Supplementary material
Source: PubMed Central journal article supplement (PMC3515758)
Supplement: cr2012156x11.pdf [file cr2012156x11.pdf]

Supplementary information, Figure S11

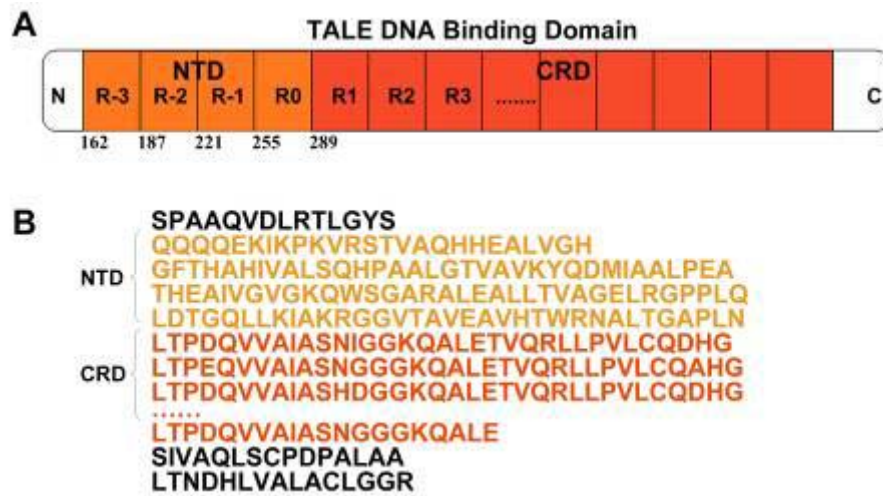

**Figure S11** The refined and optimized architecture of dTale2 DNA binding domain.

(**A-B**) The refined TALE efficient DNA binding domain not only includes the canonical central repeat domain (CRD), but also encompasses the four atypical repeats in the NTR. (**B**) The amino acids correspond to the dTale2 DNA binding domain indicated as in (**A**).
