# Supplementary material
Source: PubMed Central journal article supplement (PMC3515758)
Supplement: cr2012156x12.pdf [file cr2012156x12.pdf]

Supplementary information. Figure S12

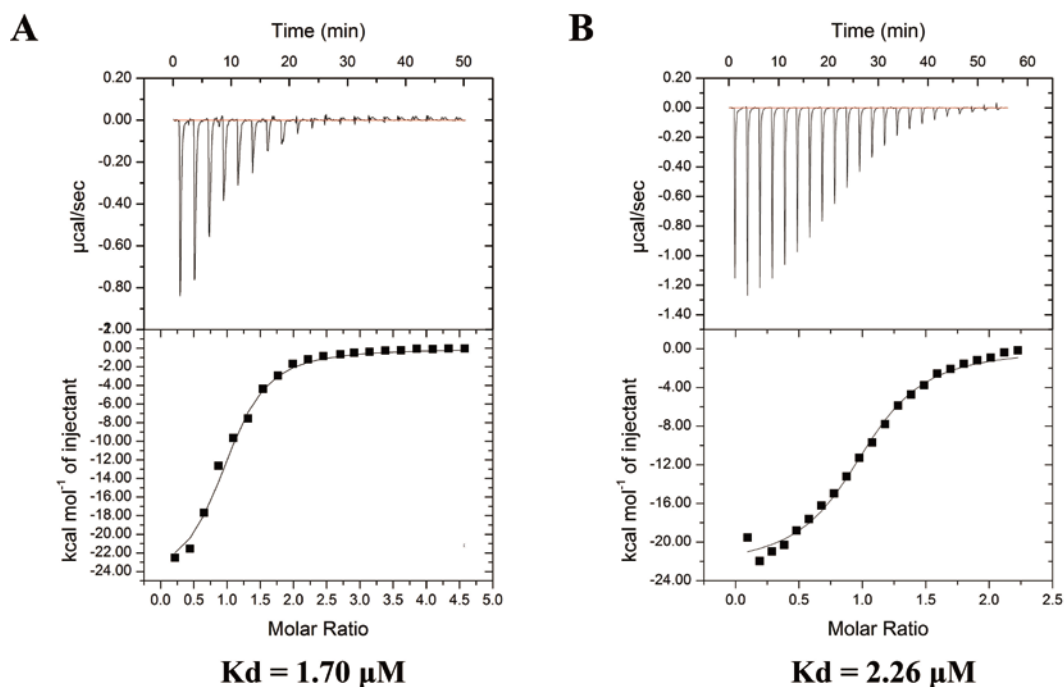

**Figure S12 The dTale2 (148-610) protein binds to nonspecific dsDNA. (A)** The dTale2 (148-610) protein binds to nonspecific DNA4. **(B)** The dTale2 (148-610) protein binds to T-deficient DNA. The curves in the lower panels are the best fit to a one-set-of-sites binding model. The derived dissociation constants  $K_d$  are indicated.
