# Supplementary material
Source: PubMed Central journal article supplement (PMC3515758)
Supplement: cr2012156x13.pdf [file cr2012156x13.pdf]

## Supplementary information, Table S1

**Table S1** Data collection and refinement statistics (molecular replacement)

|                                           | dTale2 (148-610)                      |
|-------------------------------------------|---------------------------------------|
| <b>Data collection</b>                    |                                       |
| Space group                               | P3221                                 |
| Cell dimensions                           |                                       |
| <i>a</i> , <i>b</i> , <i>c</i> (Å)        | a=b=101.28, c=95.59                   |
| $\alpha$ , $\beta$ , $\gamma$ (°)         | $\alpha$ = $\beta$ =90, $\gamma$ =120 |
| Wavelength (Å)                            | 0.9791                                |
| Unique reflections                        | 29024 (1435)                          |
| Resolution (Å)                            | 15.00-2.20 (2.24-2.20)                |
| $R_{\text{sym}}$ or $R_{\text{merge}}$    | 6.9 (31.0)                            |
| <i>I</i> / sigma                          | 37.6 (5.8)                            |
| Completeness (%)                          | 100.0 (100.0)                         |
| Redundancy                                | 10.9 (11.1)                           |
| <b>Refinement</b>                         |                                       |
| Resolution (Å)                            | 2.2                                   |
| No. reflections                           | 28963                                 |
| $R_{\text{work}}$ / $R_{\text{free}}$ (%) | 20.60/24.28                           |
| No. atoms                                 |                                       |
| Protein                                   | 3191                                  |
| Water                                     | 160                                   |
| <i>B</i> -factors                         |                                       |
| Protein                                   | 42.13                                 |
| Water                                     | 42.71                                 |
| R.m.s. deviations                         |                                       |
| Bond lengths (Å)                          | 0.008                                 |
| Bond angles (°)                           | 1.184                                 |
| Ramachandran plot statistics (%)          |                                       |
| Most favorable                            | 94.9                                  |
| Additionally allowed                      | 5.1                                   |
| Generously allowed                        | 0                                     |
| Disallowed                                | 0                                     |

Values in parentheses are for the highest resolution shell.  $R_{\text{merge}} = \sum |I_i - I_m| / \sum I_i$ , where  $I_i$  is the intensity of the measured reflection, and  $I_m$  is the mean intensity of all the symmetry-related reflections.  $R_{\text{work}} = \sum |F_o - F_c| / \sum F_o$ , where  $F_o$  and  $F_c$  are the observed and calculated structure factor amplitudes, respectively.  $R_{\text{free}}$  is calculated with 5% reflections not used in refinement.
