# Supplementary material
Source: PubMed Central journal article supplement (PMC3515758)
Supplement: cr2012156x14.pdf [file cr2012156x14.pdf]

## Supplementary information, Table S2

**Table S2** DNA constructs used in gel shift assay and ITC assay.

|                           | DNA sequences                              |
|---------------------------|--------------------------------------------|
| <b>Specific dsDNA</b>     |                                            |
| DNA1 (16bp)               | GCT TATCAATCGT CTG<br>CGA ATAGTTAGCAGAC    |
| DNA2 (17bp)               | TGCT TATCAATCGT CTG<br>CGA ATAGTTAGCA GACA |
| <b>Non-Specific dsDNA</b> |                                            |
| DNA3 (14bp)               | GGATAGAGTCGTGA<br>CCTATCTCAGCACT           |
| DNA4 (16bp)               | TCAGGATAGAGTCGTG<br>AGTCCTATCTCAGCAC       |
| <b>T-rich dsDNA</b>       |                                            |
|                           | GCTTTTGTATGTATCT<br>CGAAAACATACATAGA       |
| <b>T-deficient dsDNA</b>  |                                            |
|                           | GCGCGCGCCCCGCGCG<br>CGCGCGCGGGGCGCGC       |

The target site for dTale2 protein is indicated in red font.
