# Supplementary material
Source: PubMed Central journal article supplement (PMC3515758)
Supplement: cr2012156x15.pdf [file cr2012156x15.pdf]

**Supplementary information, Table S3**

**Table S3** Binding affinities of the dTale2 (148-610) mutants to specific DNA2.

| <b>dTale2 (148-610) mutants</b>              | <b>K<sub>d</sub> (μM)</b> |
|----------------------------------------------|---------------------------|
| K169A                                        | 0.28±0.03                 |
| K230A/Q231A                                  | 0.61±0.11                 |
| W232A                                        | 0.61±0.06                 |
| R236A                                        | 0.56±0.05                 |
| R266A                                        | 1.17±0.07                 |
| K262A/K265A/R266A                            | 2.70±0.33                 |
| K171A /K262A/K265A/R266A                     | 6.44±1.89                 |
| R173A/K262A/K265A/R266A                      | 7.30±0.88                 |
| K230A/Q231A<br>K262A/K265A/R266A             | 6.01±0.72                 |
| K167A/K169A/K171A/R173A<br>K262A/K265A/R266A | 7.50±1.08                 |
